# Supplementary material for: Antitumor effects of the antiparasitic agent ivermectin via inhibition of Yes-associated protein 1 expression in gastric cancer
Source: PubMed Central journal article supplement (PMC5746098; doi:10.18632/oncotarget.22587), 2017-11-21
Supplement: oncotarget-08-107666-s001.pdf [file oncotarget-08-107666-s001.pdf]

## Antitumor effects of the antiparasitic agent ivermectin via inhibition of Yes-associated protein 1 expression in gastric cancer

### SUPPLEMENTARY MATERIALS

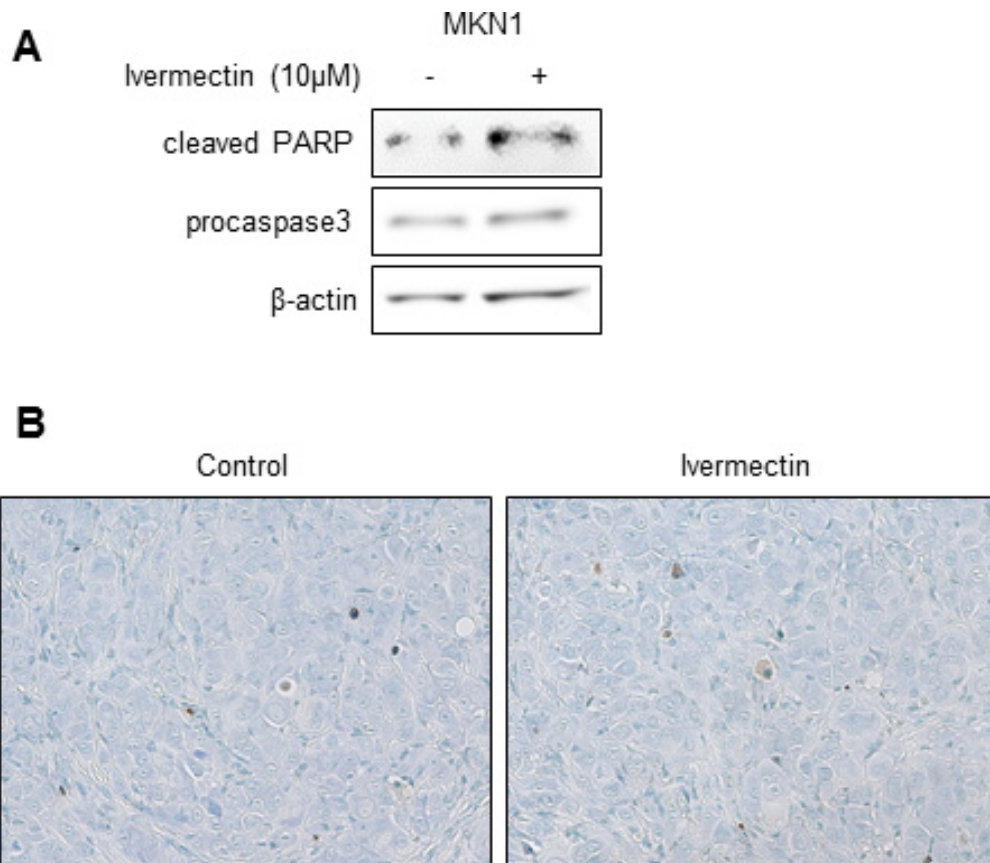

**Supplementary Figure 1: Ivermectin did not induce apoptosis *in vitro* and in a xenograft mouse model.** (A) Apoptosis assay in MKN1 cells treated with vehicle (DMSO) or 10  $\mu$ M ivermectin for 24 h. (B) TUNEL assays in tumor tissues from control and ivermectin-treated mice. Original magnification,  $\times$ 400.

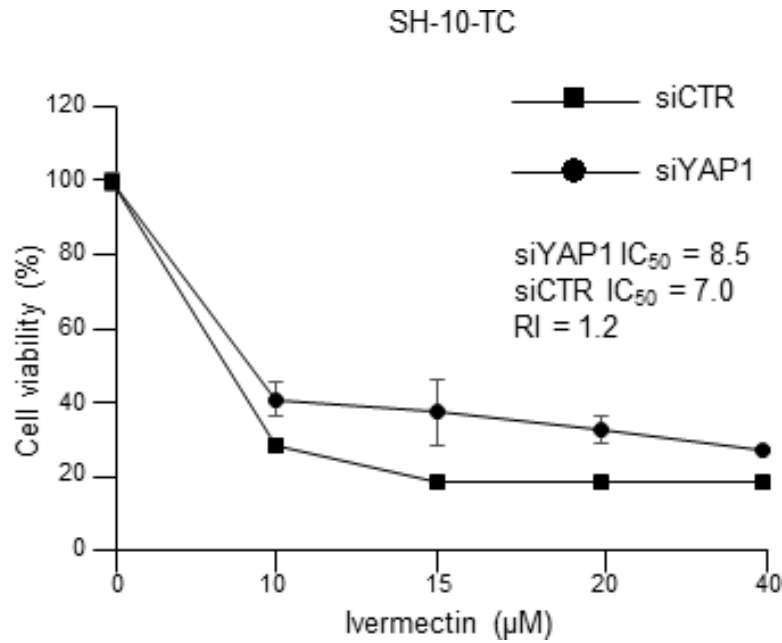

**Supplementary Figure 2: The antiproliferative effects of ivermectin were dependent on YAP1 expression in ivermectin sensitive SH-10-TC cells.**  $\text{IC}_{50}$  values and RI for ivermectin in *YAP1* siRNA-transfected SH-10-TC cells and control siRNA-transfected cells. RI; resistance index.

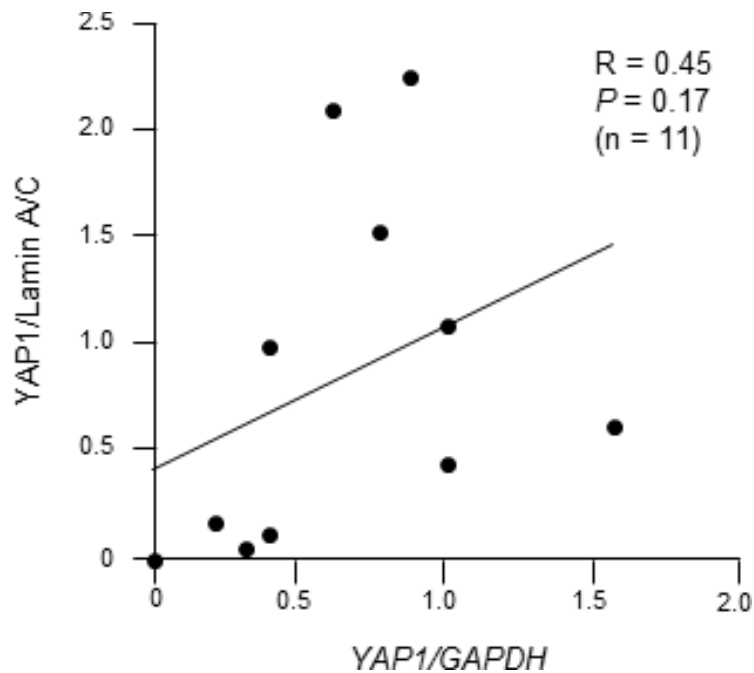

**Supplementary Figure 3: There was a positive correlation between nuclear YAP1 protein expression and *YAP1* mRNA levels by Pearson's correlation coefficient.** Correlation between nuclear YAP1 protein expression and *YAP1* mRNA levels in 11 GC cell lines.
